# Supplementary material for: Osteocyte secreted factors inhibit skeletal muscle differentiation
Source: PubMed Central journal article supplement — Bone Rep. 2017 Mar 2;6:74–80. doi: 10.1016/j.bonr.2017.02.007 (PMC5365311; doi:10.1016/j.bonr.2017.02.007), 2017-03-02
Supplement: mmc1.pdf [file mmc1.pdf]

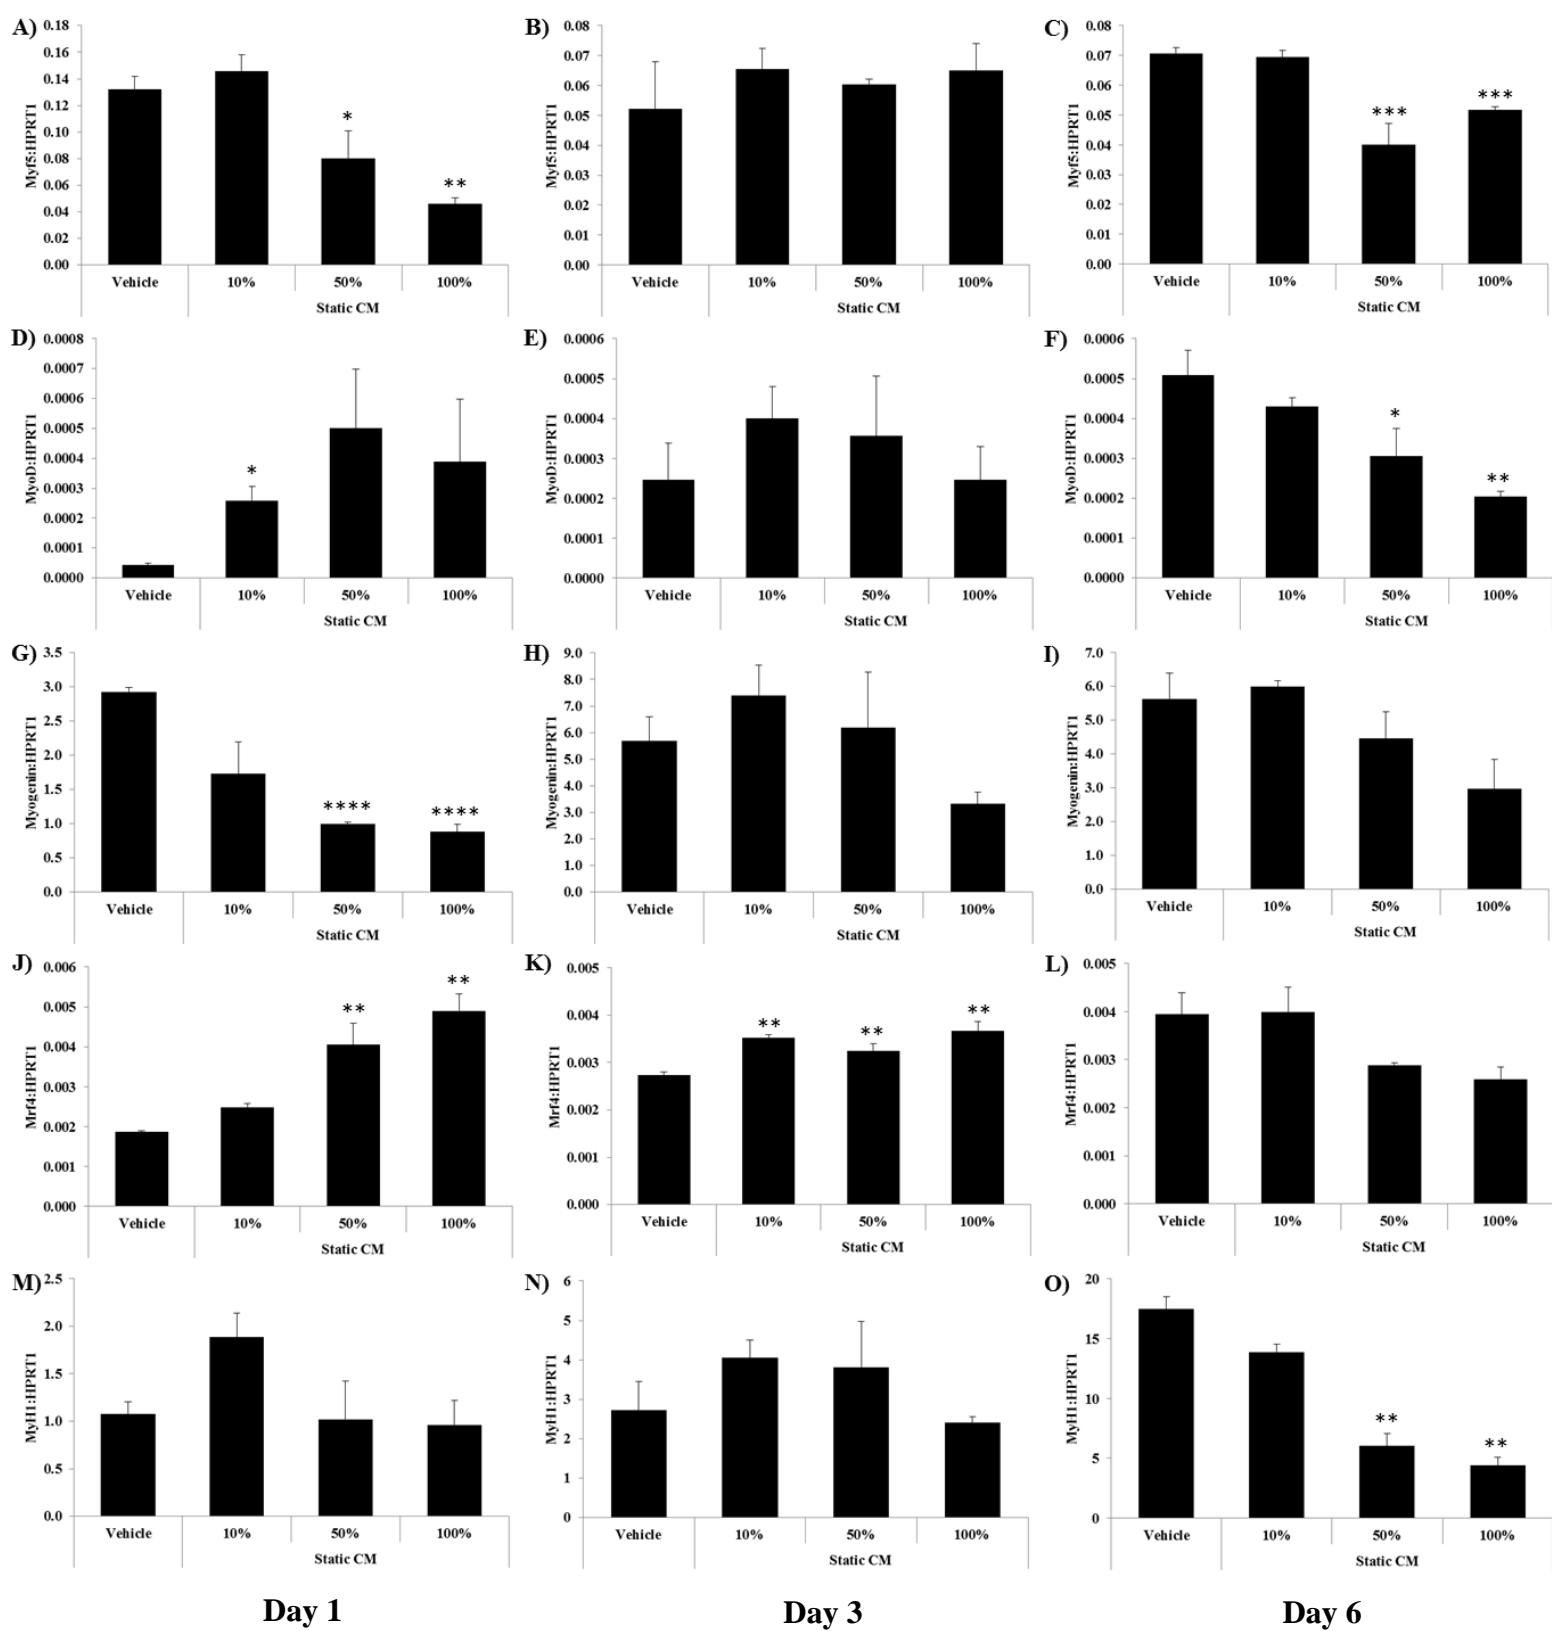

**Supplementary Figure 1:** Effect of treatment with 10, 50, and 100% static conditioned media, collected from differentiated Ocy454 cells, on C2C12 myoblasts gene expression collected 1, 3, and 6 days after treatment compared to unconditioned media (Vehicle, 10% FBS). **A-C** *Myf5*, **D-F** *Myod*, **G-I** *Mrf4*, **J-L** *Myogenin*, and **M-O** *Myh1* gene expression. Data are mean levels of the gene of interest relative to

HPRT1  $\pm$  SEM (N=3). \*P<0.05, \*\*P<0.01, \*\*\*\*P<0.0001 vs Vehicle. #P<0.05, ##P<0.01, vs static conditioned media. Data were analysed for statistical significance by ANOVA.

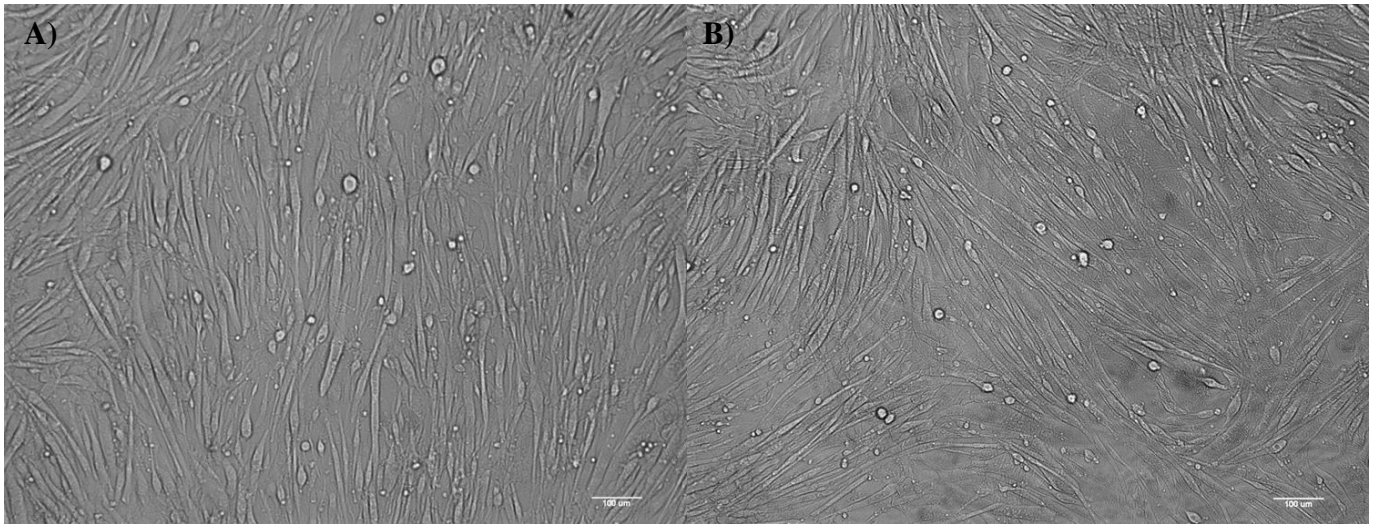

**Supplementary Figure 2.** Effect of different media on C2C12 differentiation. Representative images of C2C12 myofibers formed following 6 days of differentiation with either **A)** 2% Horse Serum or **B)** 10% Fetal Bovine Serum N=1. Scale bars represent 100 $\mu$ m.
